# Supplementary material
Source: Research Square preprint supplement (doi:10.21203/rs.3.rs-9335540/v1)
Supplement: Supplementary file 1 [file 96e6ef26ad2ad03c156af4fc.docx]

**Supplementary files**

- **Analytical performance of the RLEP qPCR**

The performance of the RLEP qPCR assay was evaluated across multiple runs to assess its reproducibility and analytical sensitivity. For each run, the amplification efficiency (as determined using the Bio-Rad CFX96 Real-Time PCR System thermocycler) was approximately 90%, with an R² value consistently close to 1 and a y-intercept around 40, indicating a strong linear correlation between the Ct values and the logarithm of DNA concentration (Supplementary files: Table S1). The assay demonstrated a detection limit of 0.00312 pg of *M. leprae* DNA (Supplementary files: Table S2), consistent with the results reported by Martinez *et al.* (2009).

- **Table S1:** qPCR descriptors extracted from linear regression of the Ct values *vs*. log of *M. leprae* DNA for the four amplification runs

| qPCR | Efficiency | R2 | Slope | Y-intercept |
| --- | --- | --- | --- | --- |
| Run1 | 95.8 | 0.96 | - 3.43 | 40.10 |
| Run2 | 90.2 | 0.89 | - 3.45 | 39.29 |
| Run3 | 94.5 | 0.96 | - 3.46 | 42.08 |
| Run4 | 89.8 | 0.99 | - 3.59 | 41.83 |

- **Table S2:** Average Ct values of six *M. leprae* DNA diluted solutions

| [RLEP] copy number | Ct | *M. leprae* DNA (pg) |
| --- | --- | --- |
| 3.106 | 17.7 ± 1.5 | 312 |
| 3.105 | 21.6 ± 2.0 | 31.2 |
| 3.104 | 24.3 ± 1.3 | 3.12 |
| 3.103 | 29.2 ±1.4 | 0.312 |
| 3.102 | 32.5 ± 0.5 | 0.0312 |
| 30 | 36.2 ± 0.8 | 0.00312 |

**Table S3:** Molecular and serological results for leprosy patients.

|  |  |  | RLEP qPCR | | | | |  |
| --- | --- | --- | --- | --- | --- | --- | --- | --- |
| ID | Months of MDT before sampling | WHO  classification | biopsy | | nasal swab | | | PGL-I IgM |
| Ct | Result | Ct | | Result |  |
| *9023* | *6* | *MB* | *14.01* | *pos* | *27.78* | | *pos* | *0.09* |
| *9018* | *8* | *MB* | *14.27* | *pos* | *28.96* | | *pos* | *NA* |
| ***9013*** | ***6*** | ***MB*** | ***16.6*** | ***pos*** | ***33.35*** | | ***pos*** | ***3.59*** |
| *9080* | *7* | *MB* | *21.58* | *pos* | *ND* | | *neg* | *NA* |
| *9068* | *0* | *MB* | *24* | *pos* | *NA* | | *NA* | *NA* |
| *9009* | *0* | *MB* | *25.32* | *pos* | *31.03* | | *pos* | *0.04* |
| *9021* | *6* | *MB* | *26.99* | *pos* | *ND* | | *neg* | *0.02* |
| ***9048*** | ***4*** | ***MB*** | ***27.33*** | ***pos*** | ***NA*** | | ***NA*** | ***1.29*** |
| ***9028*** | ***5*** | ***MB*** | ***29.69*** | ***pos*** | ***ND*** | | ***neg*** | ***0.76*** |
| *9026* | *6* | *PB* | *29.71* | *pos* | *ND* | | *neg* | *0.01* |
| *9017* | *8* | *MB* | *29.96* | *pos* | *ND* | | *neg* | *0.06* |
| *9032* | *5* | *PB* | *30.24* | *pos* | *ND* | | *neg* | *0.01* |
| *9001* | *7* | *MB* | *30.82* | *pos* | *ND* | | *neg* | *0.04* |
| *9002* | *7* | *MB* | *30.83* | *pos* | *ND* | | *neg* | *0.21* |
| *9020* | *6* | *PB* | *31.16* | *pos* | *ND* | | *neg* | *0.04* |
| *9037* | *4* | *PB* | *31.54* | *pos* | *ND* | | *neg* | *NA* |
| *9039* | *4* | *MB* | *31.8* | *pos* | *ND* | | *neg* | *0.09* |
| *9016* | *6* | *PB* | *31.84* | *pos* | *ND* | | *neg* | *0.08* |
| *9051* | *4* | *PB* | *32.08* | *pos* | *NA* | | *NA* | *NA* |
| *9052* | *7* | *MB* | *32.09* | *pos* | *NA* | | *NA* | *NA* |
| *9006* | *6* | *MB* | *32.41* | *pos* | *ND* | | *neg* | *0.14* |
| *9005* | *7* | *PB* | *32.75* | *pos* | *ND* | | *neg* | *0.18* |
| *9019* | *8* | *MB* | *32.82* | *pos* | *ND* | | *neg* | *0.04* |
| *9081* | *0* | *PB* | *33.25* | *pos* | *ND* | | *neg* | *NA* |
| *9082* | *0* | *MB* | *33.3* | *pos* | *ND* | | *neg* | *NA* |
| *9044* | *4* | *PB* | *34.91* | *pos* | *ND* | | *neg* | *0.13* |
| *9010* | *5* | *MB* | *36.38* | *pos* | *ND* | | *neg* | *0.01* |
| *9000* | *9* | *PB* | *36.59* | *pos* | *ND* | | *neg* | *0.03* |
| ***9073*** | ***4*** | ***MB*** | ***NA*** | ***NA*** | ***ND*** | | ***neg*** | ***1.31*** |
| *9015* | *6* | *PB* | *ND* | *neg* | *ND* | | *neg* | *0.01* |
| *9003* | *7* | *MB* | *ND* | *neg* | *ND* | | *neg* | *0.05* |
| *9043* | *3* | *PB* | *ND* | *neg* | *ND* | | *neg* | *0.12* |
| *9004* | *7* | *MB* | *ND* | *neg* | *ND* | | *neg* | *0.18* |
| *9012* | *5* | *PB* | *ND* | *neg* | *ND* | | *neg* | *0.20* |
| *9041* | *6* | *MB* | *NA* | *NA* | *ND* | | *neg* | *0.01* |
| *9031* | *5* | *MB* | *NA* | *NA* | *ND* | | *neg* | *0.02* |
| *9046* | *5* | *MB* | *NA* | *NA* | *ND* | | *neg* | *0.02* |
| *9011* | *5* | *PB* | *NA* | *NA* | *ND* | | *neg* | *0.02* |
| *9036* | *4* | *MB* | *NA* | *NA* | *ND* | | *neg* | *0.03* |
| *9035* | *4* | *PB* | *NA* | *NA* | *ND* | | *neg* | *0.03* |
| *9079* | *5* | *MB* | *NA* | *NA* | *ND* | | *neg* | *0.03* |
| *9049* | *4* | *MB* | *NA* | *NA* | *ND* | | *neg* | *0.04* |
| *9014* | *6* | *PB* | *NA* | *NA* | *ND* | | *neg* | *0.04* |
|  |  |  |  |  |  | |  |  |
|  |  |  | RLEP qPCR | | | | |  |
| ID | Months of MDT before sampling | WHO  classification | biopsy | | Nasal swab | | | PGL-I IgM |
| Ct | Result | Ct | Result | | Ratio (R) |
| *9047* | *4* | *MB* | *NA* | *NA* | *ND* | *neg* | | *0.05* |
| *9045* | *5* | *PB* | *NA* | *NA* | *ND* | *neg* | | *0.05* |
| *9007* | *6* | *PB* | *NA* | *NA* | *ND* | *neg* | | *0.05* |
| *9022* | *6* | *PB* | *NA* | *NA* | *ND* | *neg* | | *0.06* |
| *9042* | *3* | *PB* | *NA* | *NA* | *ND* | *neg* | | *0.08* |
| *9078* | *4* | *PB* | *NA* | *NA* | *ND* | *neg* | | *0.08* |
| *9029* | *6* | *MB* | *NA* | *NA* | *ND* | *neg* | | *0.18* |
| *9025* | *6* | *PB* | *NA* | *NA* | *ND* | *neg* | | *0.19* |
| *9033* | *5* | *PB* | *NA* | *NA* | *ND* | *neg* | | *0.20* |
| ***9030*** | ***6*** | ***PB*** | ***NA*** | ***NA*** | ***ND*** | ***neg*** | | ***0.36*** |
| ***9024*** | ***6*** | ***MB*** | ***NA*** | ***NA*** | ***ND*** | ***neg*** | | ***0.98*** |
| *9034* | *5* | *PB* | *NA* | *NA* | *ND* | *neg* | | *0.21* |
| *9038* | *4* | *MB* | *NA* | *NA* | *ND* | *neg* | | *NA* |
| *9027* | *6* | *MB* | *NA* | *NA* | *ND* | *neg* | | *NA* |
| *9076* | *9* | *MB* | *NA* | *NA* | *ND* | *neg* | | *NA* |
| *9077* | *9* | *PB* | *NA* | *NA* | *ND* | *neg* | | *NA* |
| *9074* | *10* | *PB* | *NA* | *NA* | *ND* | *neg* | | *NA* |
| *9075* | *10* | *PB* | *NA* | *NA* | *ND* | *neg* | | *NA* |

Data are provided by Ct value in ascending order; NA: not applicable (no samples available as patients did not give consent); pos: positive; neg: negative; MB: multibacillary; PB: paucibacillary; Ct: Cycle threshold and ND: not determined. WHO: World Health Organization; MDT: Multi-drug therapy. R: ratio between the fluorescence signal measured at the test line and at the flow control line on the UCP-LFA test strip.Patients who were seropositive for anti-PGL-I IgM are indicated in bold.

**Table S4**. Sequencing data: detection of DNA mutations in *M. leprae* conferring antibiotic resistance and genotyping using 3 techniques Line Probe Assay, Sanger Sequencing and Deeplex Myc-Lep (wt: wild type, nd: not done; ud: undetermined, *ML:* *M. leprae*)

| ID | Ct RLEP | GenoType  LepraeDR | | | Sanger Sequencing | | | | Deeplex Myc-Lep | | | | | | | | | Genotypes |
| --- | --- | --- | --- | --- | --- | --- | --- | --- | --- | --- | --- | --- | --- | --- | --- | --- | --- | --- |
| *rpoB* | *folP1* | *gyrA* | *rpoB* | *folP1* | *gyrA* | *ml2446* | *hsp65* | *ctpC* | *ctpI* | *folP1* | *gyrA* | *gyrB* | *nth* | *ribD* | *rpoB* |  |
| *9023* | 14.01 | wt | wt | wt | wt | wt | wt | a1015g | *ML* | wt | wt | wt | wt | wt | wt | wt | wt | 1D Malagasy |
| *9018* | 14.27 | wt | wt | wt | wt | wt | wt | a1015g | *ML* | wt | wt | wt | wt | wt | wt | wt | wt | 1D Malagasy |
| *9013* | 16.6 | wt | wt | wt | wt | wt | wt | a1015g | *ML* | wt | wt | wt | wt | wt | wt | wt | wt | 1D Malagasy |
| *9068* | 24.03 | wt | wt | wt | wt | wt | wt | a1015g | *ML* | wt | wt | wt | wt | wt | wt | ud | wt | 1D Malagasy |
| *9009* | 25.32 | wt | wt | wt | wt | wt | wt | a1015g | *ML* | wt | wt | wt | wt | wt | wt | wt | wt | 1D Malagasy |
| *9021* | 26.99 | ud | ud | ud | ud | ud | ud | a1015g | *ML* | wt | wt | wt | wt | Wt | wt | ud | wt | 1D Malagasy |
| *9048* | 27.33 | wt | wt | wt | wt | wt | wt | a1015g | ud | wt | wt | wt | wt | ud | wt | ud | wt | 1D Malagasy |
| *9028* | 29.69 | ud | ud | ud | ud | ud | ud | a1015g | *ML* | wt | wt | ud | wt | ud | ud | ud | wt | 1D Malagasy |
| *9026* | 29.71 | ud | ud | ud | ud | ud | ud | a1015g | ud | wt | wt | ud | wt | ud | ud | ud | wt | 1D Malagasy |
| *9017* | 29.96 | ud | ud | ud | ud | ud | ud | ud | ud | ud | wt | wt | wt | ud | ud | ud | wt | 1D Malagasy |
| *9032* | 30.24 | ud | ud | ud | ud | ud | ud | ud | *nd* | *nd* | *nd* | *nd* | *nd* | *nd* | *nd* | *nd* | *nd* | ud |
| *9001* | 30.82 | ud | ud | ud | ud | ud | ud | ud | *nd* | *nd* | *nd* | *nd* | *nd* | *nd* | *nd* | *nd* | *nd* | ud |
| *9002* | 30.83 | ud | ud | ud | ud | ud | ud | ud | *nd* | *nd* | *nd* | *nd* | *nd* | *nd* | *nd* | *nd* | *nd* | ud |
| *9020* | 31.16 | wt | wt | wt | wt | wt | wt | a1015g | *nd* | *nd* | *nd* | *nd* | *nd* | *nd* | *nd* | *nd* | *nd* | 1D Malagasy |
| *9037* | 31.54 | ud | ud | ud | ud | ud | ud | ud | *nd* | *nd* | *nd* | *nd* | *nd* | *nd* | *nd* | *nd* | *nd* | ud |
| *9039* | 31.8 | ud | ud | ud | ud | ud | ud | ud | *nd* | *nd* | *nd* | *nd* | *nd* | *nd* | *nd* | *nd* | *nd* | ud |
| *9016* | 31.84 | ud | ud | ud | ud | ud | ud | ud | *nd* | *nd* | *nd* | *nd* | *nd* | *nd* | *nd* | *nd* | *nd* | ud |
| *9051* | 32.08 | ud | ud | ud | ud | ud | ud | ud | *nd* | *nd* | *nd* | *nd* | *nd* | *nd* | *nd* | *nd* | *nd* | ud |
| *9052* | 32.09 | ud | ud | ud | ud | ud | ud | ud | *nd* | *nd* | *nd* | *nd* | *nd* | *nd* | *nd* | *nd* | *nd* | ud |
| *9006* | 32.41 | ud | ud | ud | ud | ud | ud | ud | *nd* | *nd* | *nd* | *nd* | *nd* | *nd* | *nd* | *nd* | *nd* | ud |
| *9005* | 32.75 | ud | ud | ud | ud | ud | ud | ud | *nd* | *nd* | *nd* | *nd* | *nd* | *nd* | *nd* | *nd* | *nd* | ud |
| *9019* | 32.82 | wt | wt | wt | wt | wt | wt | a1015g | *nd* | *nd* | *nd* | *nd* | *nd* | *nd* | *nd* | *nd* | *nd* | 1D Malagasy |
| *9082* | 33.3 | wt | wt | wt | wt | wt | wt | ud | *nd* | *nd* | *nd* | *nd* | *nd* | *nd* | *nd* | *nd* | *nd* | ud |
| *9044* | 34.91 | ud | ud | ud | ud | ud | ud | ud | *nd* | *nd* | *nd* | *nd* | *nd* | *nd* | *nd* | *nd* | *nd* | ud |
| *9010* | 36.38 | ud | ud | ud | ud | ud | ud | ud | *nd* | *nd* | *nd* | *nd* | *nd* | *nd* | *nd* | *nd* | *nd* | ud |
| *9000* | 36.59 | ud | ud | ud | ud | ud | ud | ud | *nd* | *nd* | *nd* | *nd* | *nd* | *nd* | *nd* | *nd* | *nd* | ud |


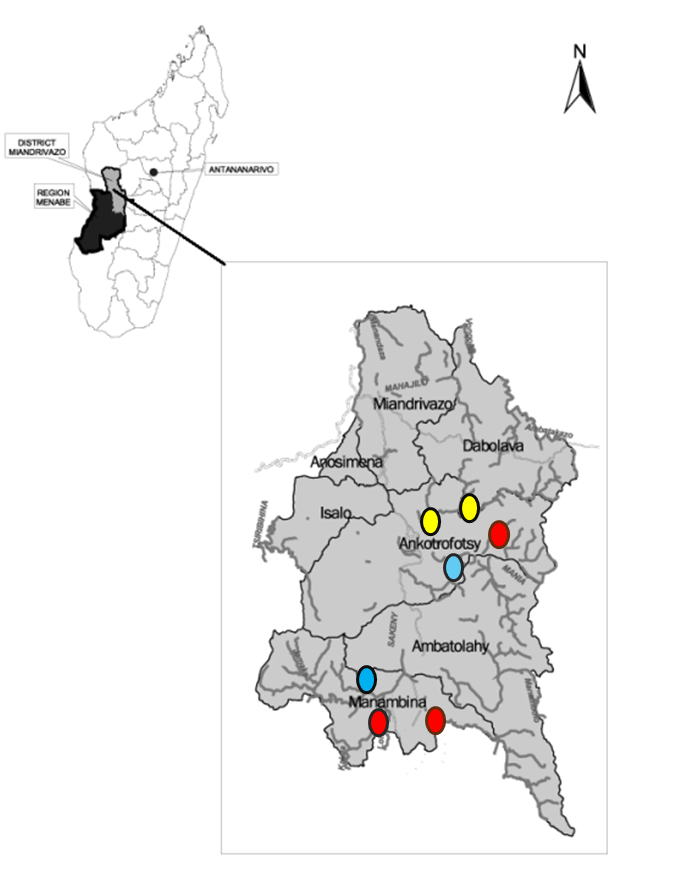


**Figure 1A:** Distribution of VNTR-based phylogenetic clusters across the Miandrivazo district (2018-2023)


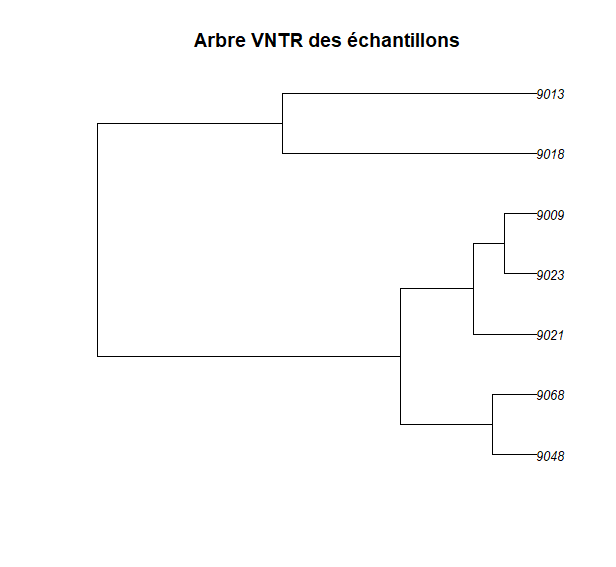


**Figure 1B**: VNTR-based phylogenetic relationships between samples

**Table S5**: Biological sampling of the 80 leprosy patients detected from 2019 to 2021 in the PEOPLE study.

| Clinicals signs | | RLEP qPCR skin biopsy (n=33) | | | RLEP qPCR nasal swab (n=57) | | | anti-PGL I IgM fingerstick blood (n=47) | | |
| --- | --- | --- | --- | --- | --- | --- | --- | --- | --- | --- |
| NSampled | pos | neg | NSampled | pos | neg | NSampled | Seropos | Seroneg |
| MB (41) | dMB (24) | 18 | 17 | 1 | 17 | 5 | 12 | 14 | 4 | 10 |
| nMB (17) | 2* | 1 | 1 | 13 | 0 | 13 | 11 | 1 | 10 |
| PB (39) | dPB (31) | 13 | 10 | 3 | 23 | 0 | 23 | 19 | 0 | 19 |
| nPB (8) | 0 | 0 | 0 | 4 | 0 | 4 | 3 | 1 | 2 |
| Total (80) | | 33 | 28 | 5 | 57 | 5 | 52 | 47 | 6 | 41 |

neg: negative and pos: positive; d: dermatological; n: neural; MB: multibacillary; PB: paucibacillary /* For these two pure neural leprosy cases without skin lesions, nerve-level skin biopsies were performed at the top of the knee with patient consent, in line with national guidelines, although this procedure was not originally specified in the PEOPLE protocol.
